# Supplementary material
Source: Springer Nature journal article supplement (https://www.springermedizin.de/resource/supplementary/12902_2013_190_MOESM1_ESM.pdf/9515726)
Supplement: MOESM1 [file 9515726]

**Appendix 1: Kaplan-Meier survival curves and hazard ratios for nephropathy (N=1365, sustained albuminuria  $\geq 40\text{mg}/24\text{ hrs}$ ) in the DCCT dataset according to LPA (data is categorised according to Standard / Intensive treatment arm, and Primary / Secondary prevention cohort). Excludes patients with albuminuria  $\geq 40\text{mg}/24\text{ hrs}$  at baseline**

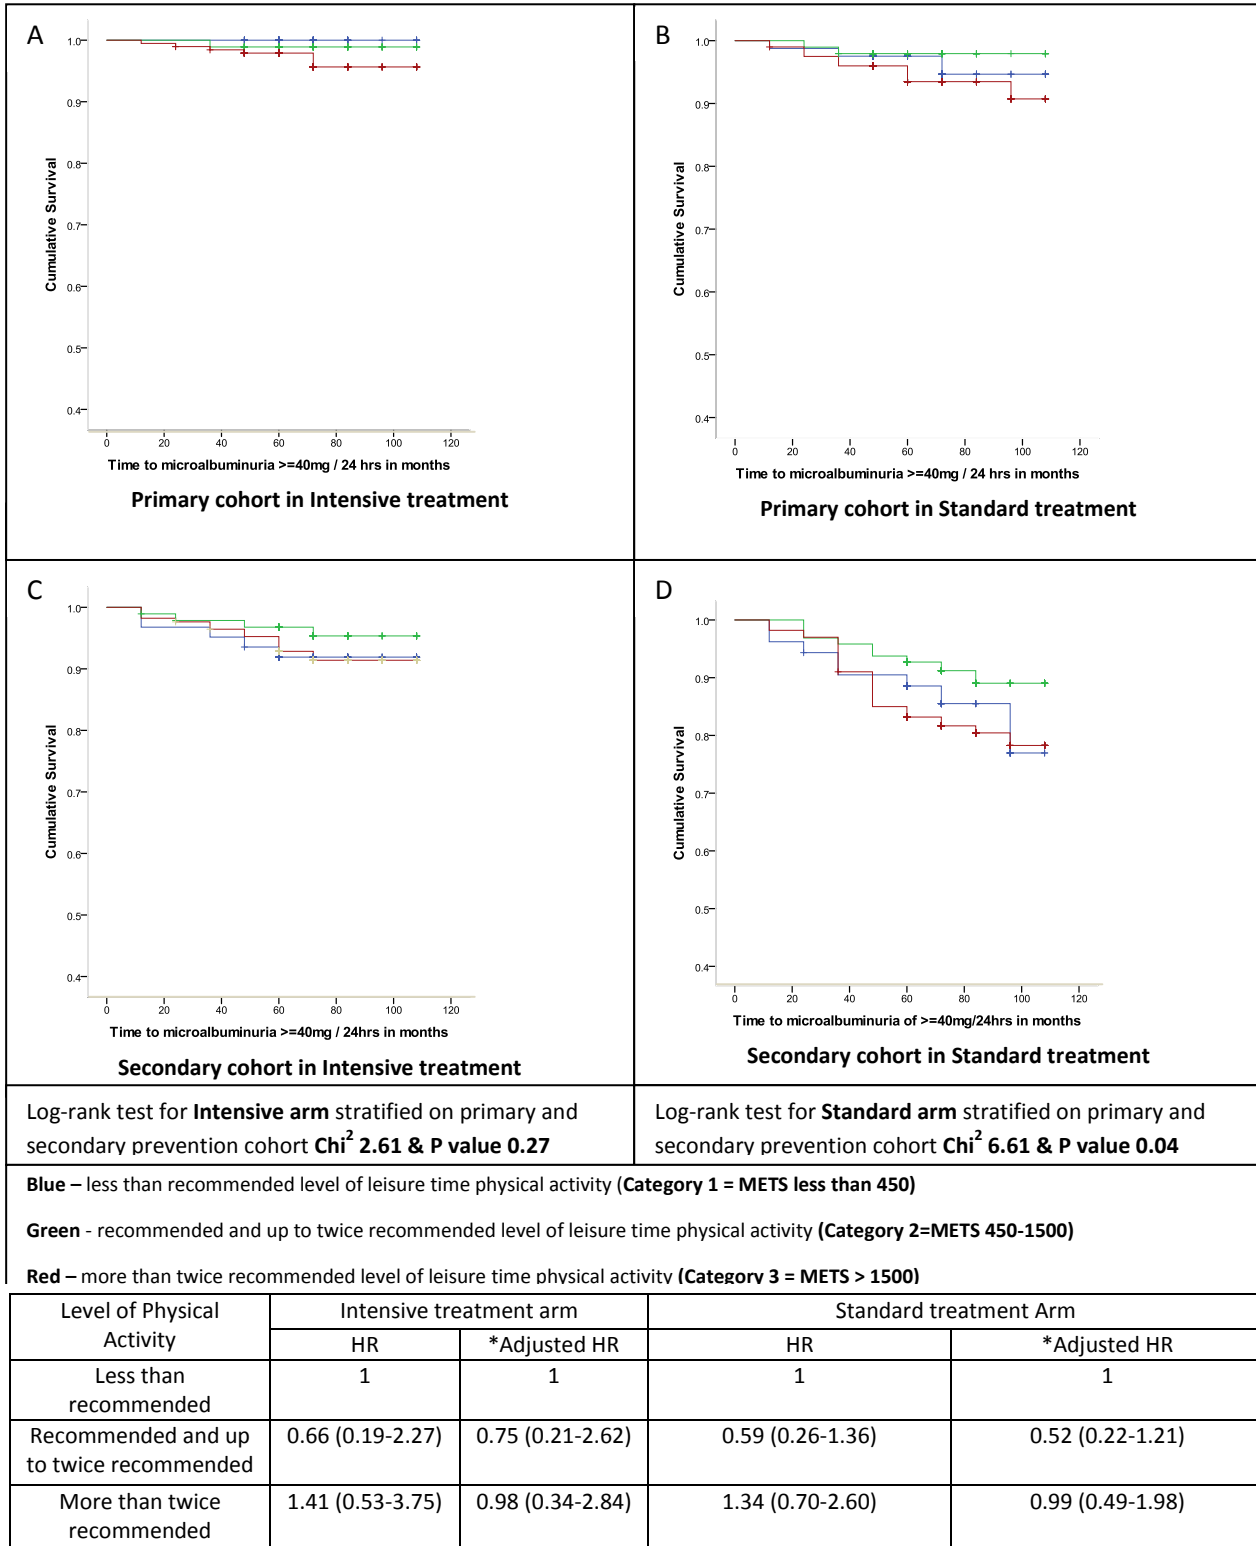

\*Adjusted for age, gender, duration of diabetes, HbA1c and occupational activity
